# Supplementary material
Source: PubMed Central journal article supplement (PMC3337853)
Supplement: NIHMS347275-supplement-1_si_001.pdf [file NIHMS347275-supplement-1_si_001.pdf]

Supporting information for

## Fragmentation of $\beta$ -Hydroxy Hydroperoxides

Xiaodong Gu<sup>†</sup>, Wujuan Zhang<sup>§</sup> and Robert G. Salomon\*

*Department of Chemistry, Case Western Reserve University, Cleveland, Ohio, 44106*  
*Present Addresses: <sup>†</sup>Department of Cell Biology, Lerner Research Institute, Cleveland, Ohio, 44195. <sup>§</sup>Division of Pathology and Laboratory Medicine, Cincinnati Children's Hospital Research Foundation, Cincinnati, OH 45229*

[rgs@case.edu](mailto:rgs@case.edu)

Page 1 - General Methods

Page 2-11 - NMR spectra

**General methods.** Proton magnetic resonance ( $^1\text{H}$  NMR) spectra and carbon magnetic resonance ( $^{13}\text{C}$  NMR) spectra were recorded on a Varian Inova AS400 spectrometer operating 400 MHz. Proton chemical shifts are reported in parts per million (ppm) on  $\delta$  scale relative to  $\text{CDCl}_3$  ( $\delta$  7.24),  $\text{CD}_3\text{OD}$  ( $\delta$  3.30) or  $\text{D}_2\text{O}$  ( $\delta$  4.80).  $^1\text{H}$  NMR spectral data are tabulated in terms of multiplicity of proton absorption (s, singlet; d, doublet; t, triplet; m, multiplet; br, broad), coupling constants (Hz), number of protons. All high resolution mass spectra were recorded on a Kratos AEI MS25 RFA high resolution mass spectrometer at 20 eV.

All solvents were distilled under a nitrogen atmosphere prior to use, and all materials were obtained from Aldrich unless specified. Chromatography was performed with ACS grade solvents.  $R_f$  values are quoted for plates of thickness 0.25 mm. The plates were visualized with iodine or phosphomolybdic acid reagent. Flash column chromatography was performed on 230-400 mesh silica gel supplied by E. Merck.

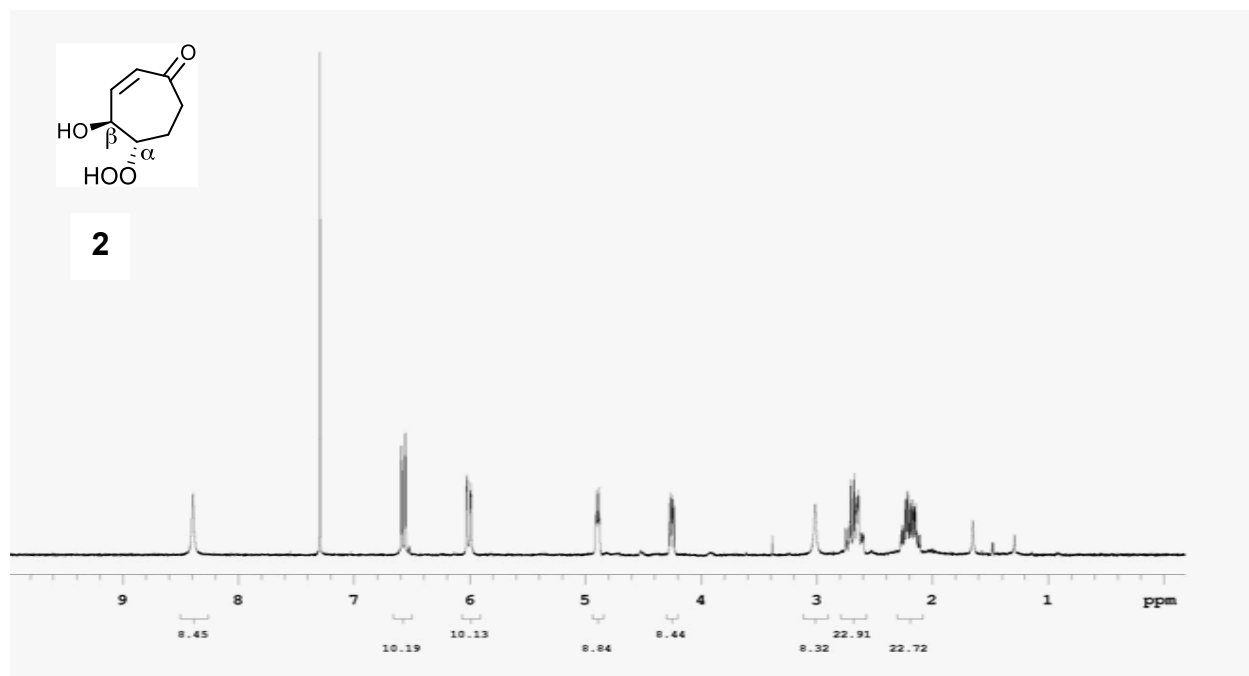

**Fig S1** The 400 MHz  $^1\text{H}$  NMR ( $\text{CDCl}_3$ ) spectrum of 5-hydroperoxy-4-hydroxy-cyclohept-2-enone (**2**).

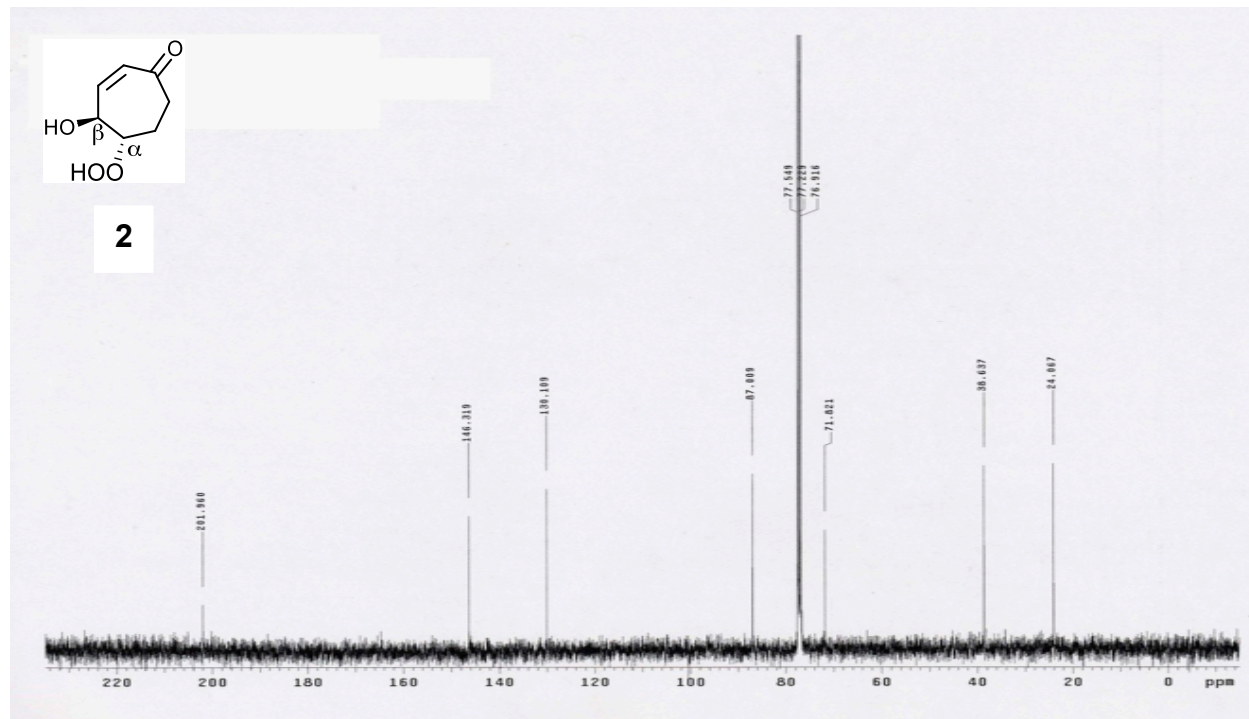

**Fig S2** The 100 MHz  $^{13}\text{C}$  NMR ( $\text{CDCl}_3$ ) spectrum of 5-hydroperoxy-4-hydroxy-cyclohept-2-enone (**2**).

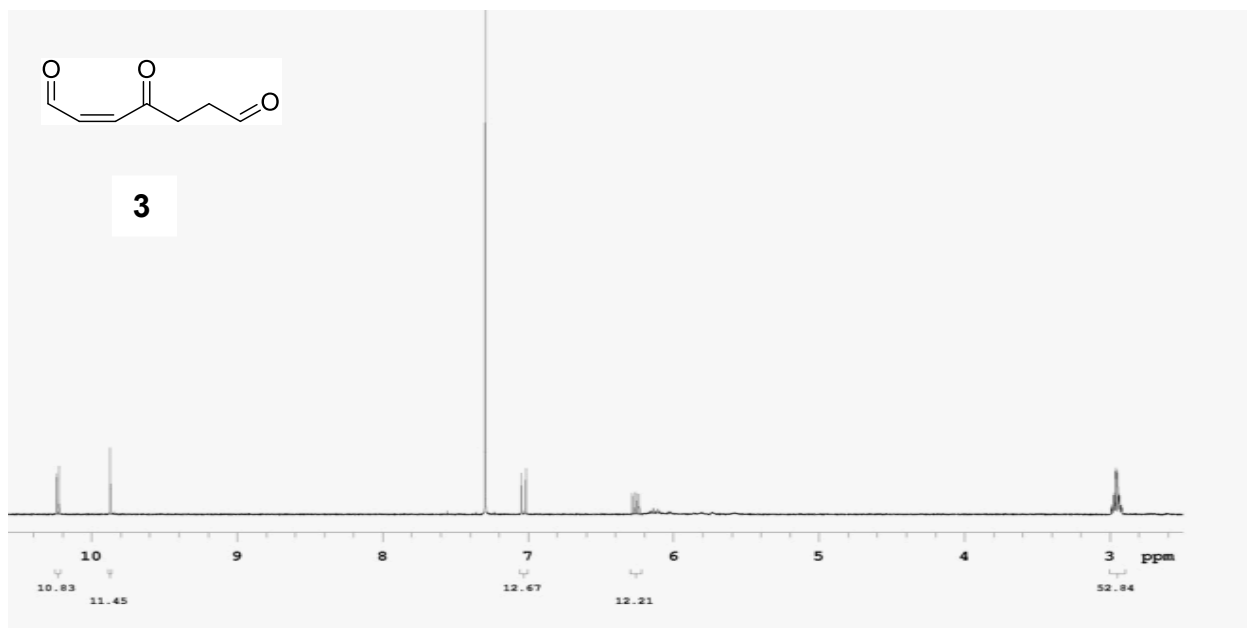

**Fig S3** The 400 MHz  $^1\text{H}$  NMR ( $\text{CDCl}_3$ ) spectrum of 4-oxo-hept-2-enal (**3**).

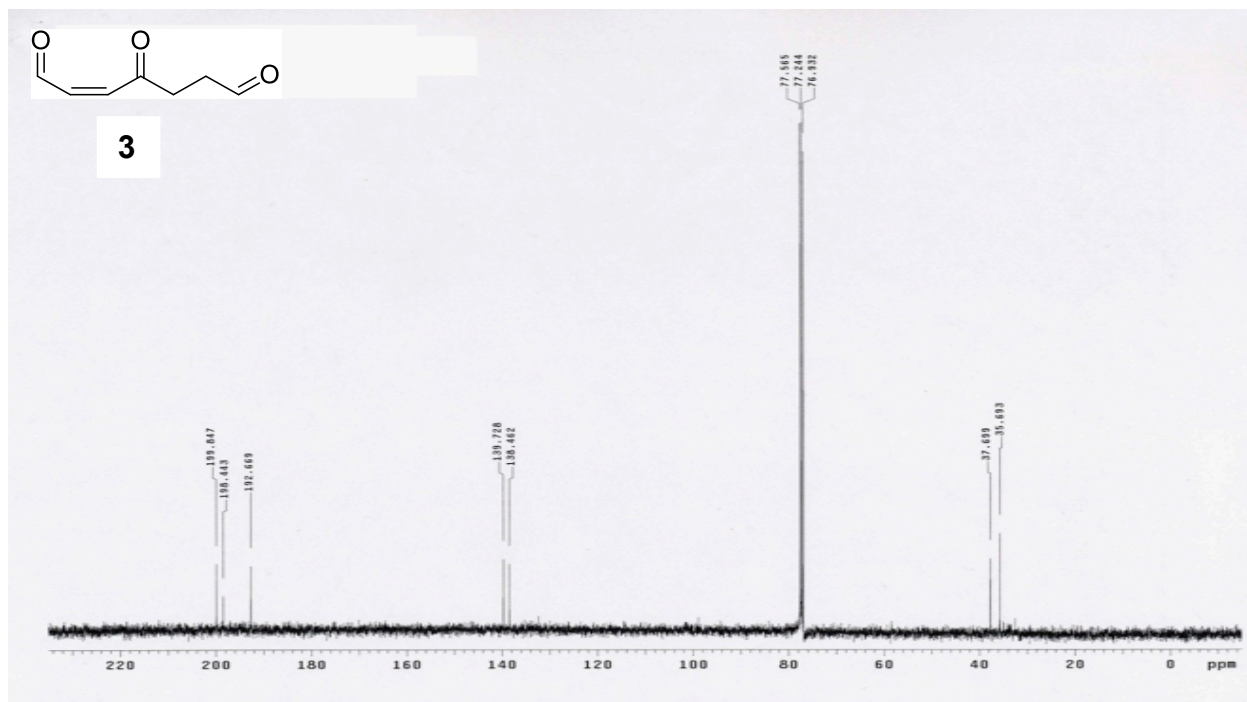

**Fig S4** The 100 MHz  $^{13}\text{C}$  NMR ( $\text{CDCl}_3$ ) spectrum of 4-oxo-hept-2-enal (**3**).

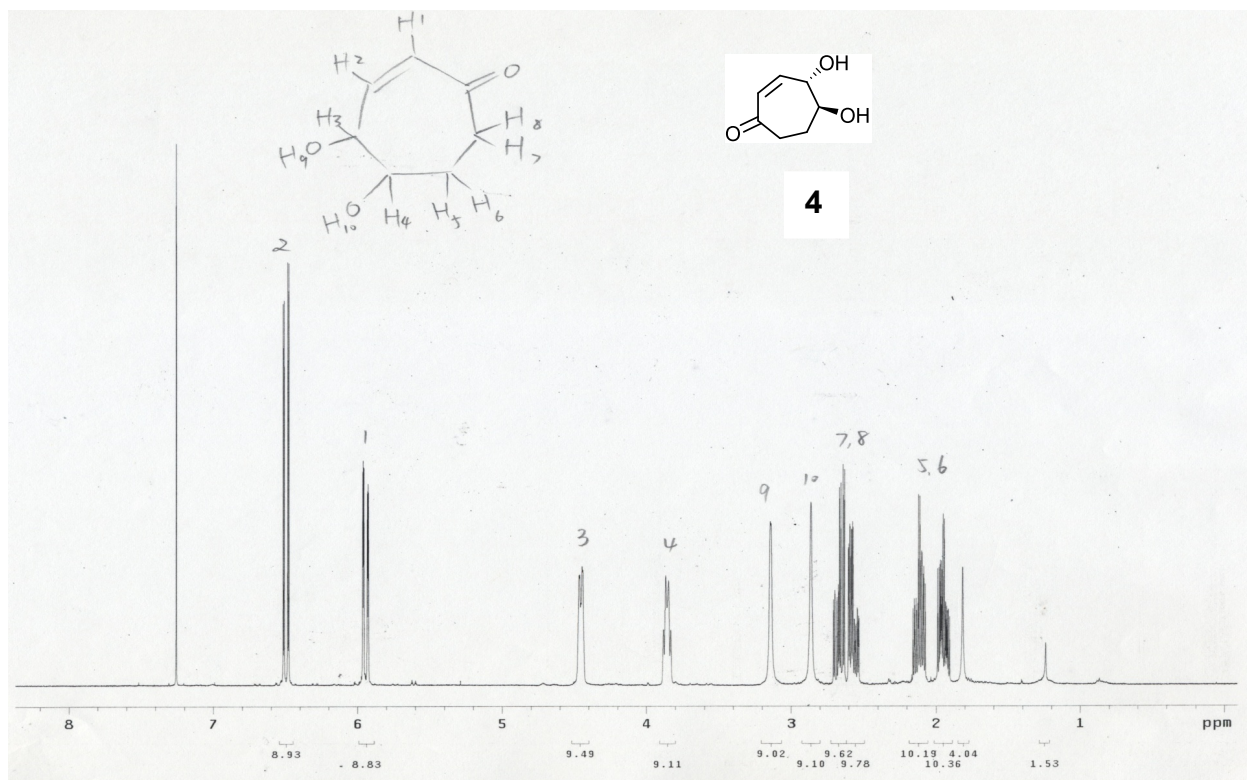

**Fig S5** The 400 MHz  $^1\text{H}$  NMR ( $\text{CDCl}_3$ ) spectrum of 4,5-dihydroxy-cyclohept-2-enone (4).

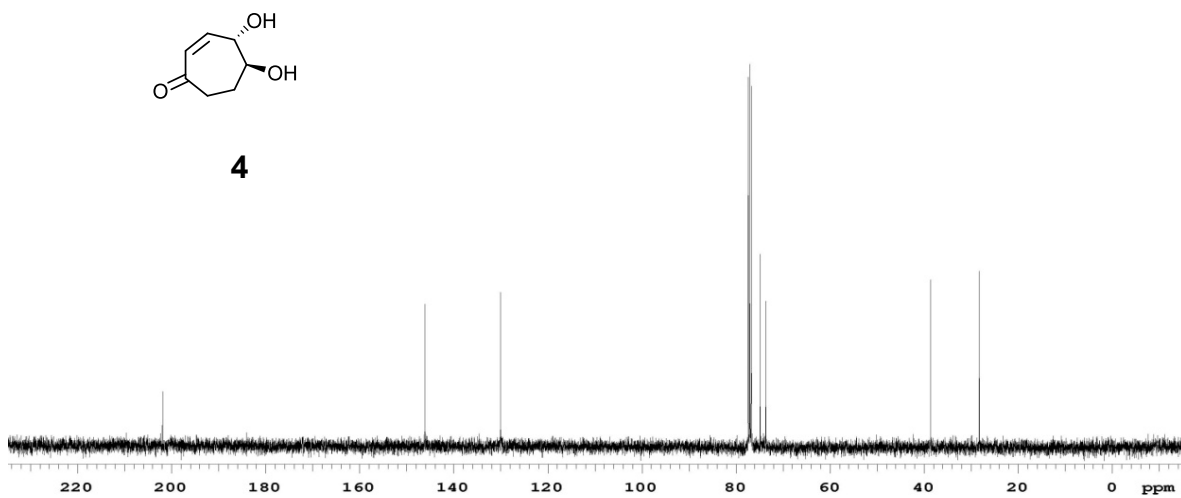

**Fig S6** The 100 MHz  $^{13}\text{C}$  NMR ( $\text{CDCl}_3$ ) spectrum of 4,5-dihydroxy-cyclohept-2-enone (4).

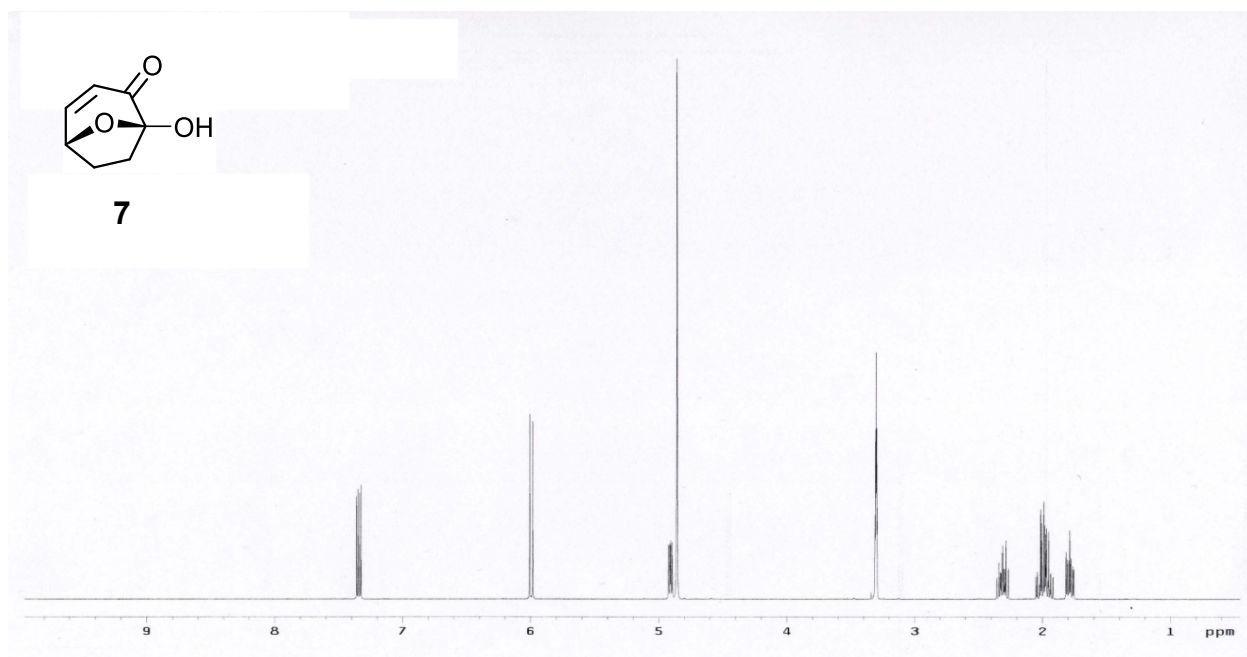

**Fig S7** The 400 MHz  $^1\text{H}$  NMR ( $\text{CD}_3\text{OD}$ ) spectrum of 1-hydroxy-8-oxa-bicyclo[3.2.1]oct-3-en-2-one (7).

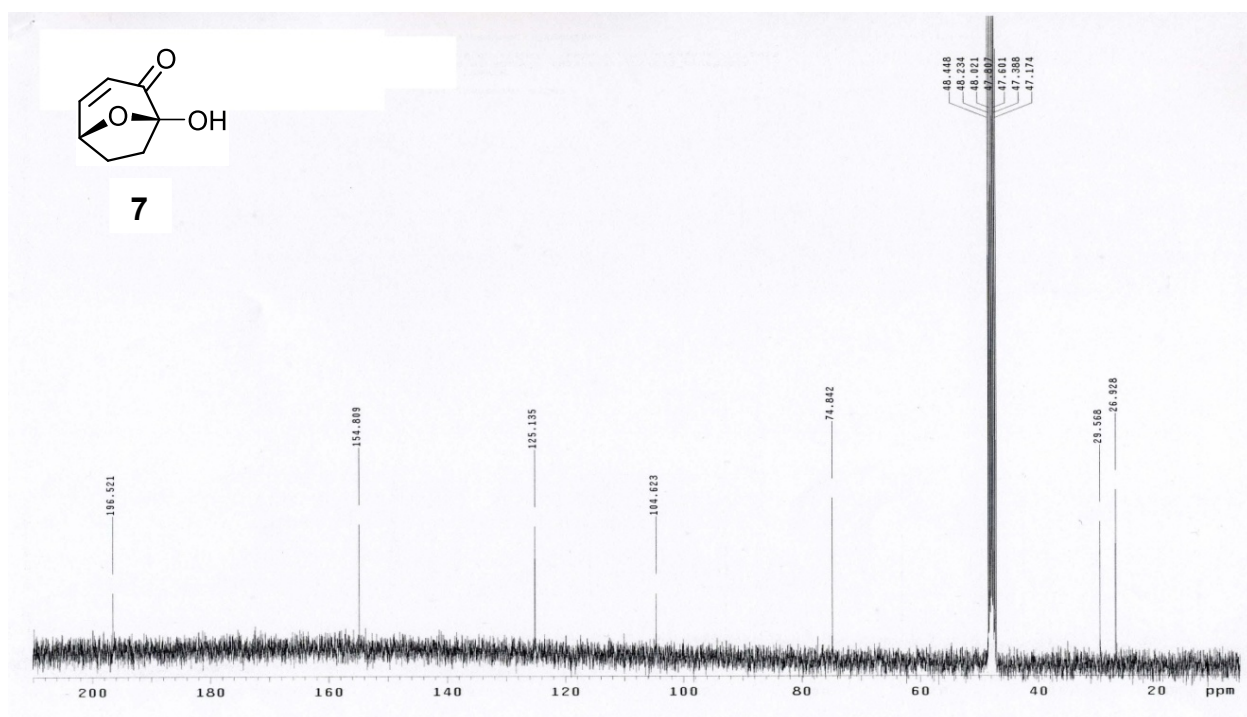

**Fig S8** The 100 MHz  $^{13}\text{C}$  NMR ( $\text{CD}_3\text{OD}$ ) spectrum of 1-hydroxy-8-oxa-bicyclo[3.2.1]oct-3-en-2-one (7).

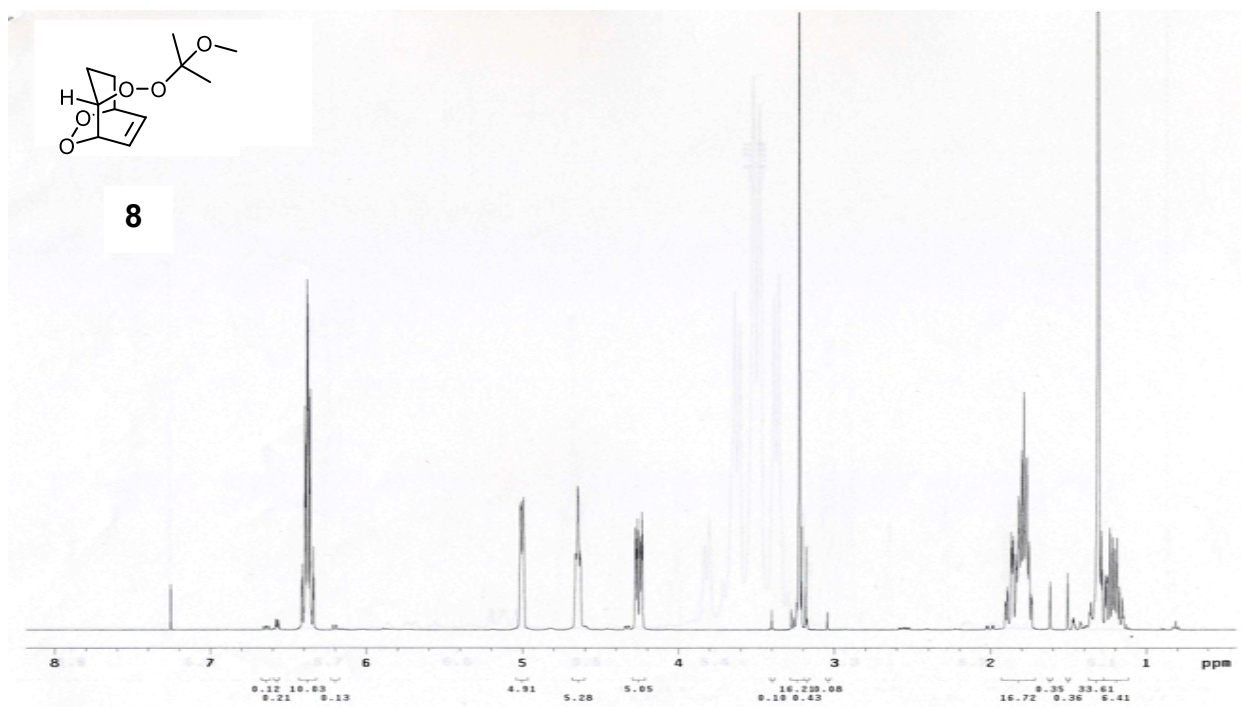

**Fig S9** The 400 MHz <sup>1</sup>H NMR (CDCl<sub>3</sub>) spectrum of 2-(1-methoxy-1-methyl-ethylperoxy)-6,7-dioxabicyclo[3.2.2]non-8-ene (**8**).

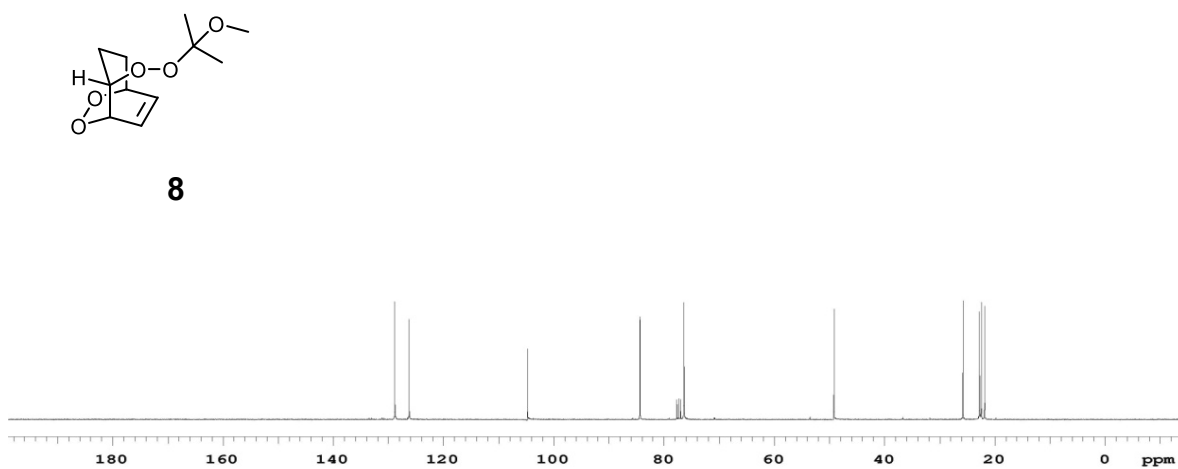

**Fig S10** The 100 MHz <sup>13</sup>C NMR (CDCl<sub>3</sub>) spectrum of 2-(1-methoxy-1-methyl-ethylperoxy)-6,7-dioxabicyclo[3.2.2]non-8-ene (**8**).

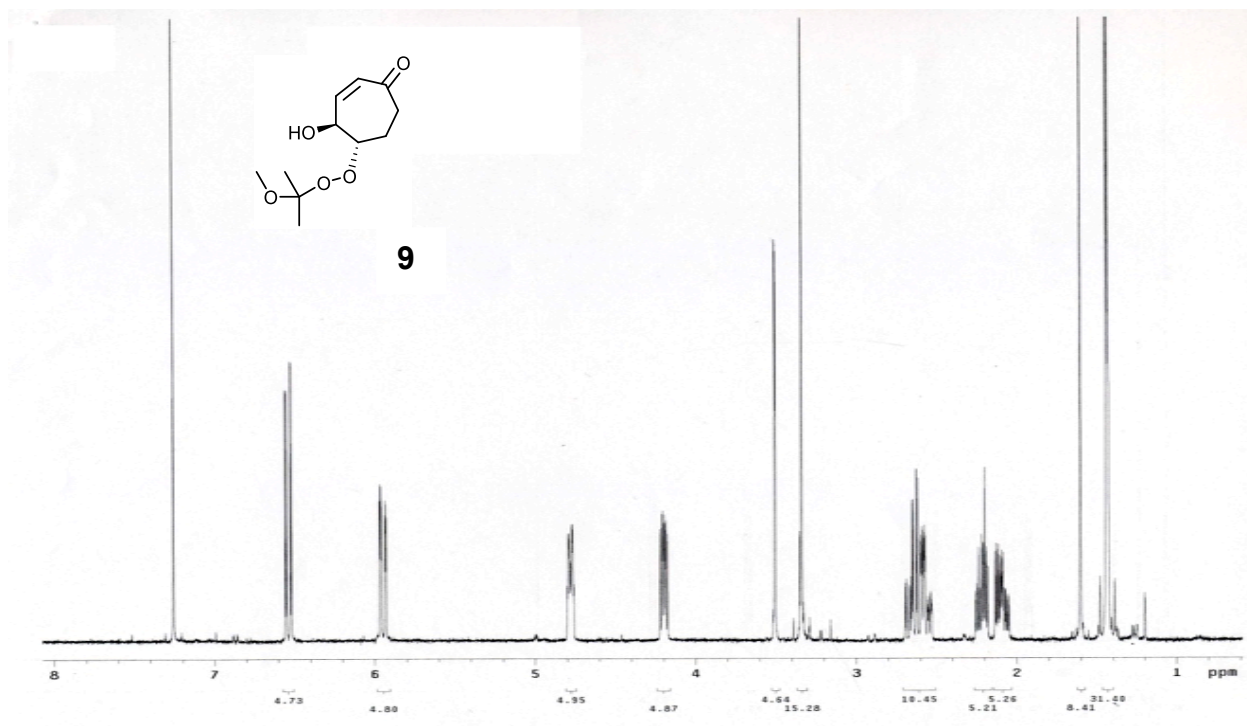

**Fig S11** The 400 MHz  $^1\text{H}$  NMR ( $\text{CDCl}_3$ ) spectrum of 4-hydroxy-5-(1-methoxy-1-methyl-ethylperoxy)-cyclohept-2-enone (**9**).

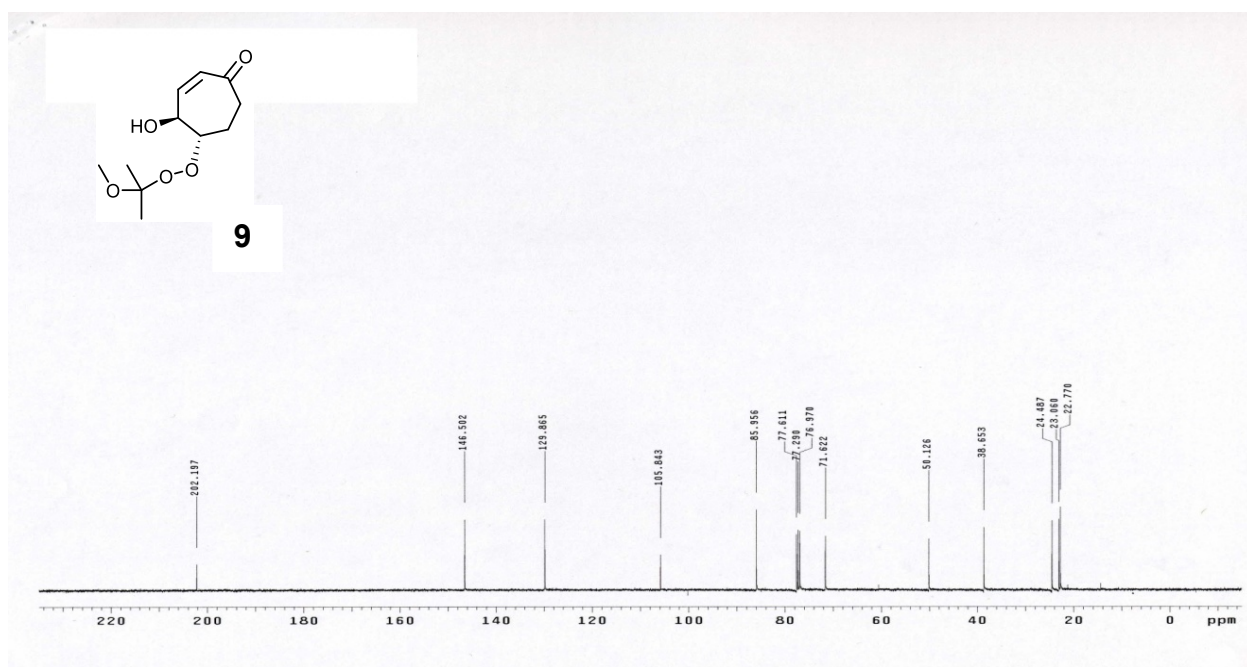

**Fig S12** The 100 MHz  $^{13}\text{C}$  NMR ( $\text{CDCl}_3$ ) spectrum of 4-hydroxy-5-(1-methoxy-1-methyl-ethylperoxy)-cyclohept-2-enone (**9**).



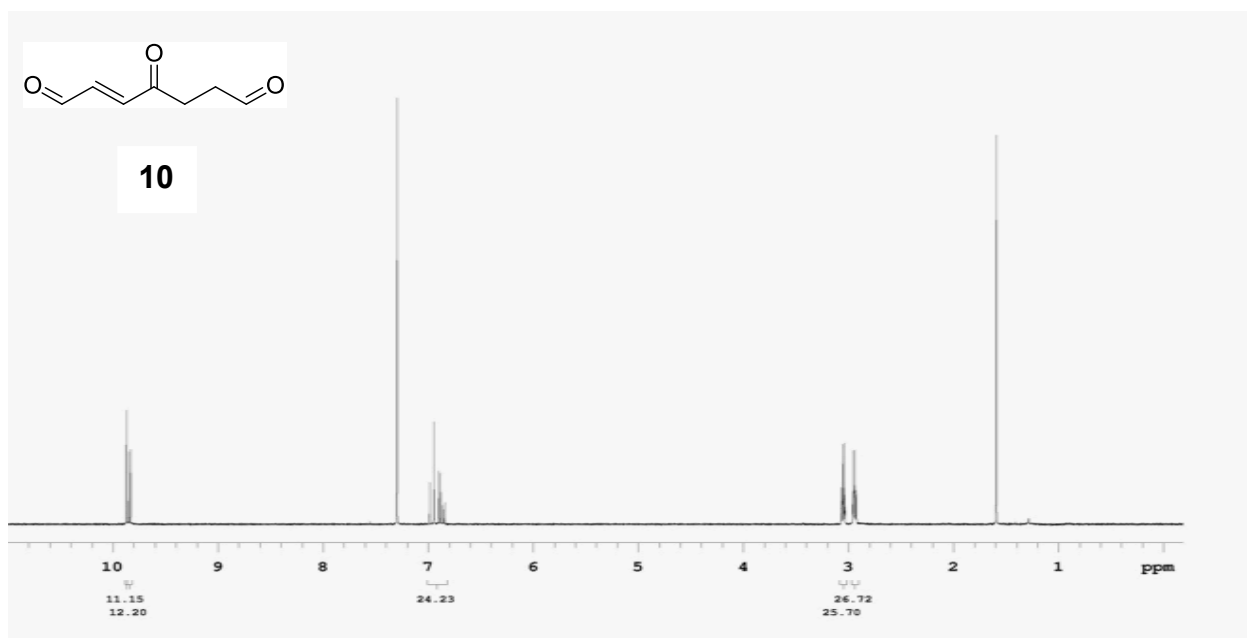

**Fig S13** The 400 MHz <sup>1</sup>H NMR (CDCl<sub>3</sub>) spectrum of 4-oxo-hept-2-enal (**10**).

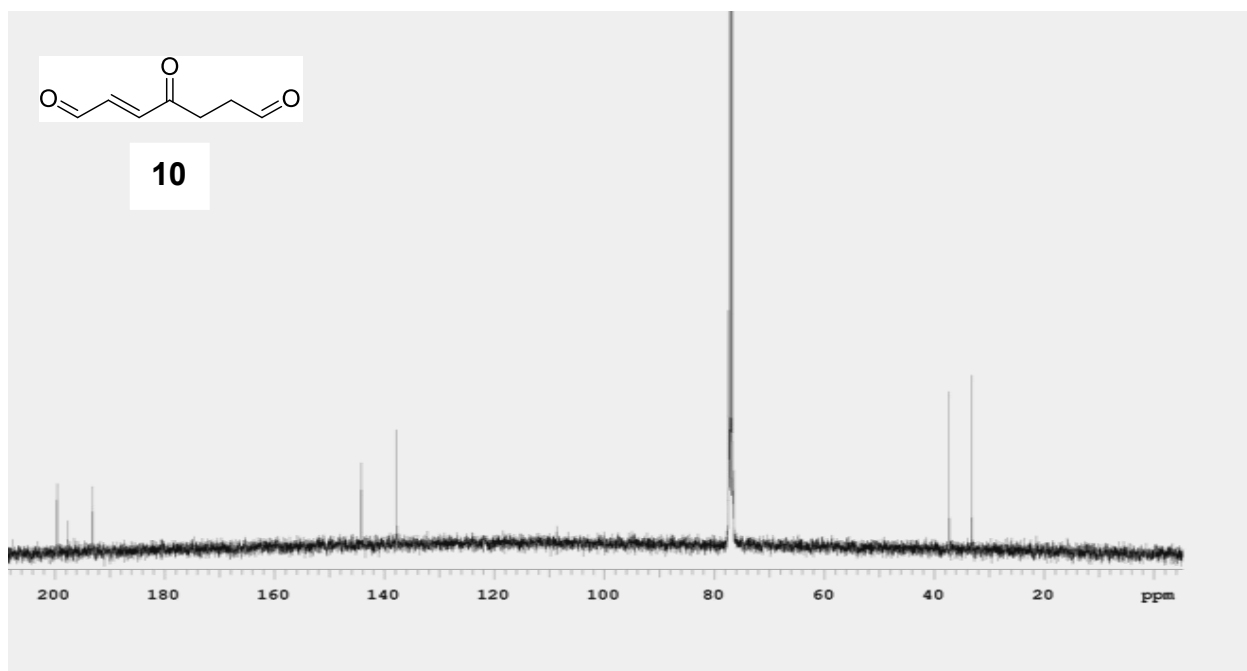

**Fig S14** The 100 MHz <sup>13</sup>C NMR (CDCl<sub>3</sub>) spectrum of 4-oxo-hept-2-enal (**10**).

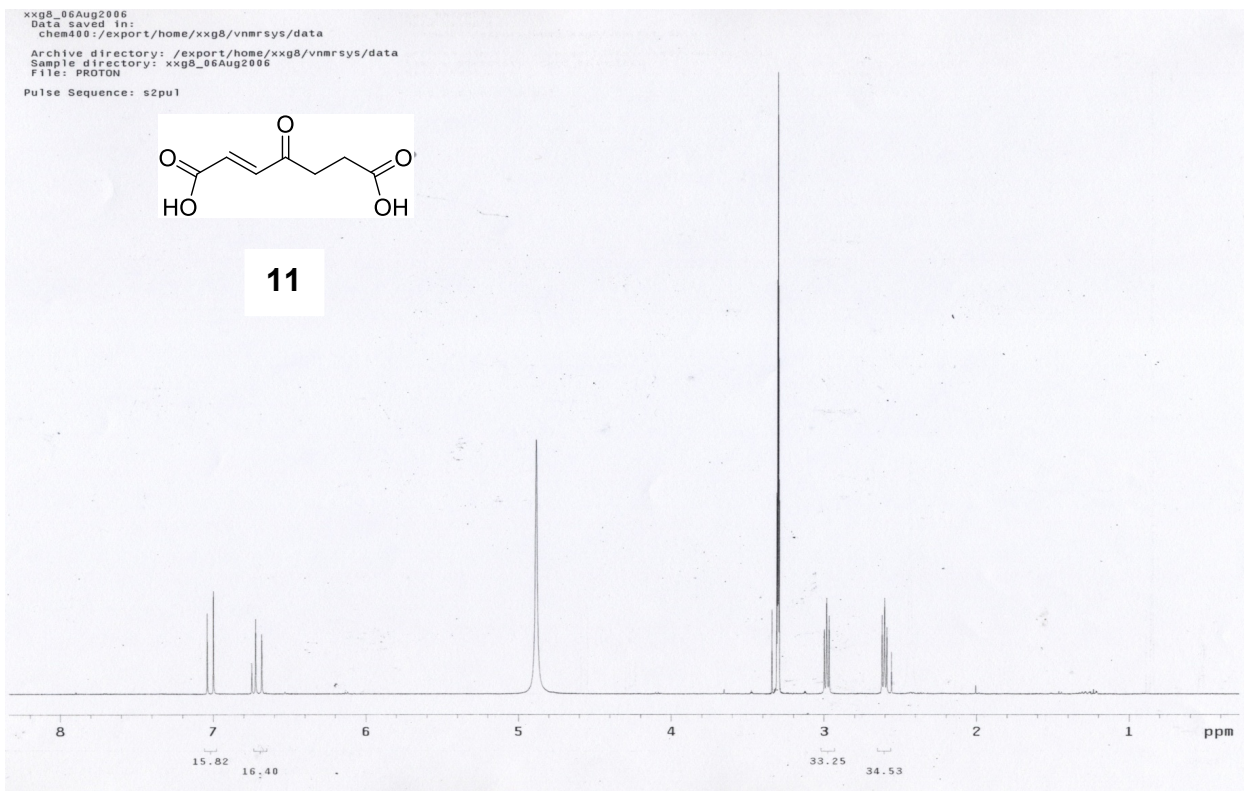

**Fig S15** The 400 MHz  $^1\text{H}$  NMR ( $\text{CD}_3\text{OD}$ ) spectrum of 4-oxo-hept-2-enedioic acid (**11**).

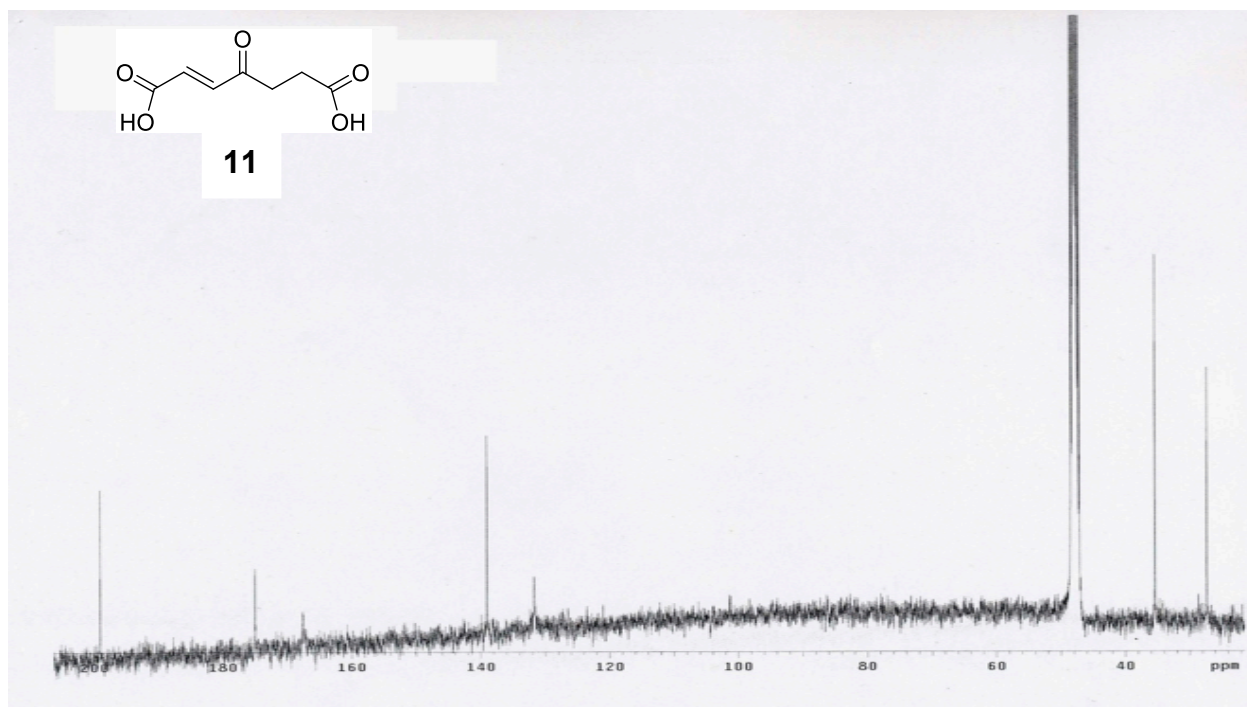

**Fig S16** The 100 MHz  $^{13}\text{C}$  NMR ( $\text{CD}_3\text{OD}$ ) spectrum of 4-oxo-hept-2-enedioic acid (**11**).

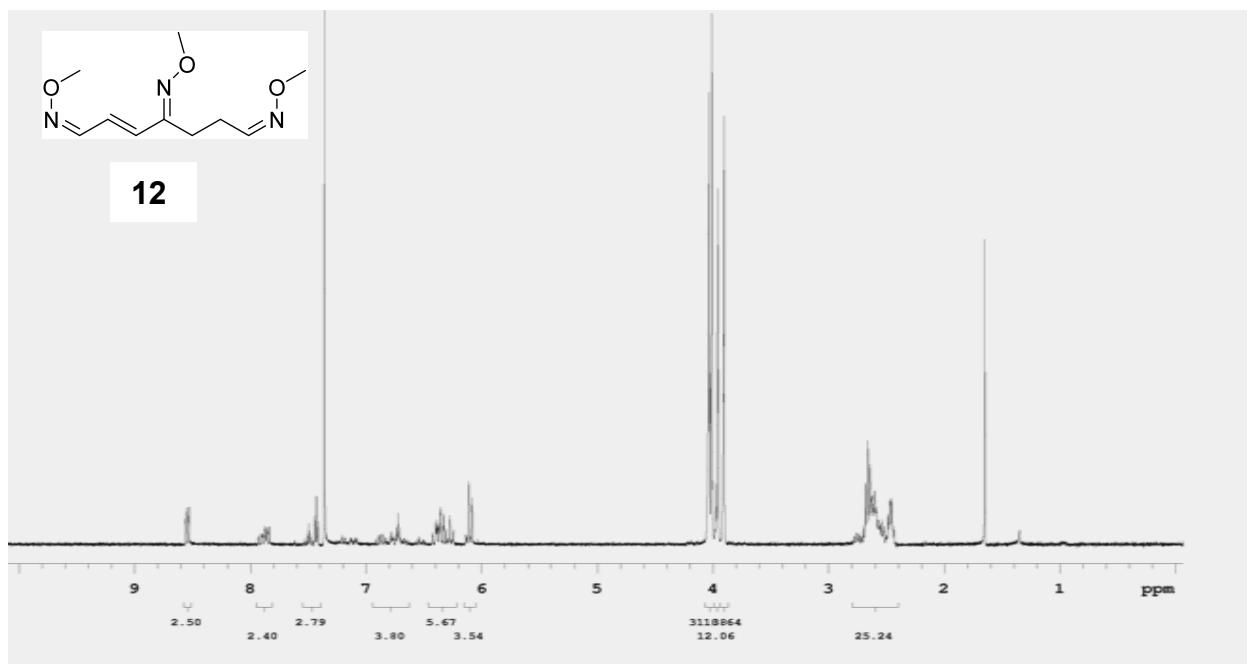

**Fig S17** The 400 MHz  $^1\text{H}$  NMR ( $\text{CDCl}_3$ ) spectrum of 4-methoxyimino-hept-2-enedial bis-(O-methyl-oxime) (**12**).

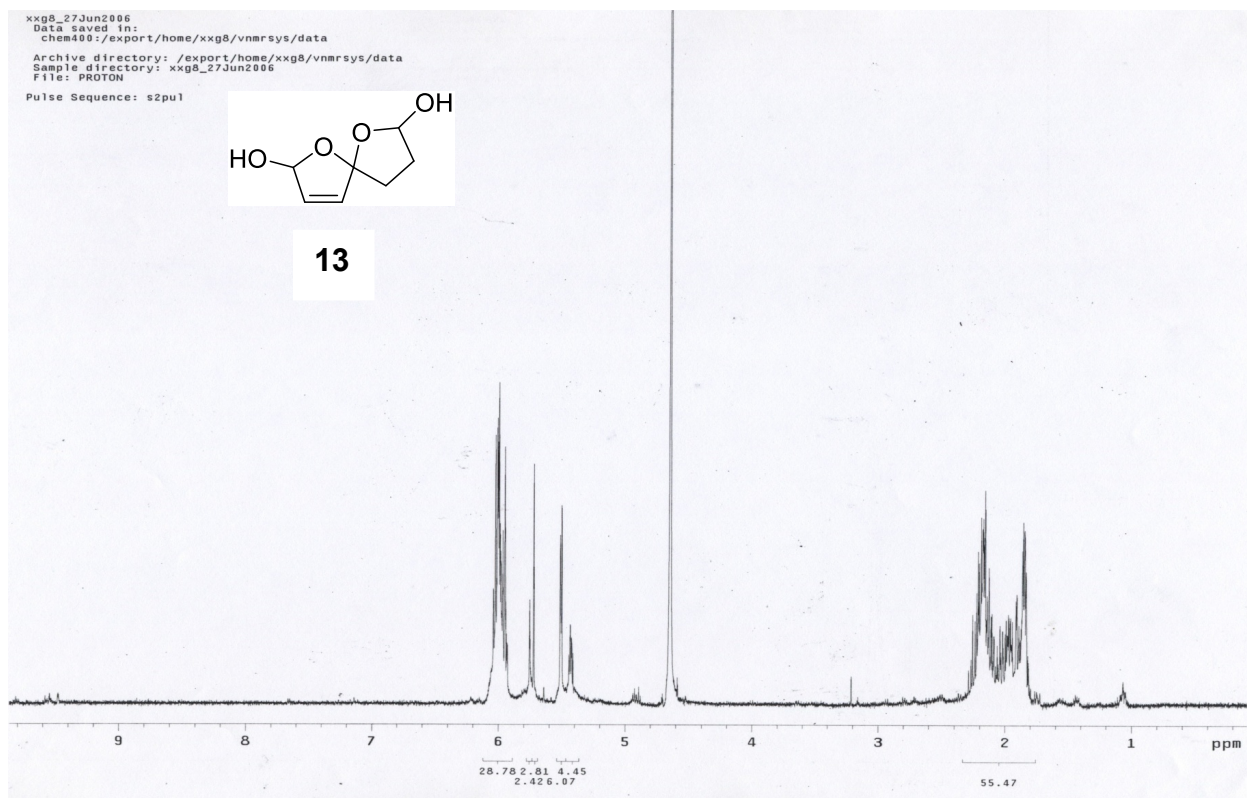

**Fig S18** The 400 MHz  $^1\text{H}$  NMR ( $\text{D}_2\text{O}$ ) spectrum of aldehyde hydrate (**13**).
